# Supplementary material for: First Anti-Inflammatory Peptide AnmTX Sco 9a-1 from the Swimming Sea Anemone Stomphia coccinea
Source: MDPI journal article supplement (doi:10.3390/biom12111705), 2022-11-17
Supplement: s1 [file s1]

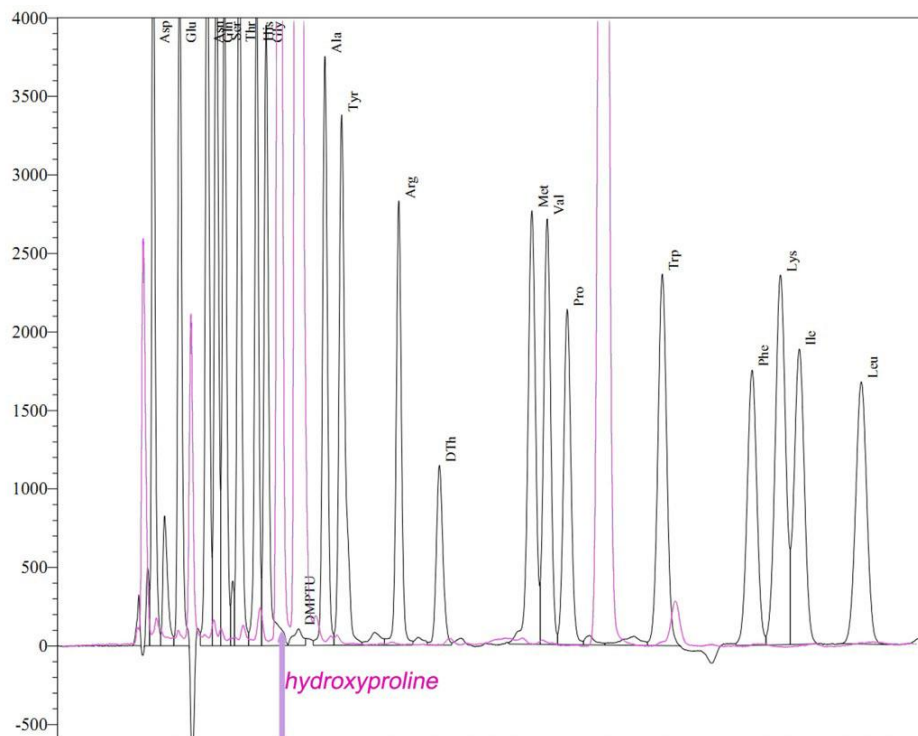

(a)

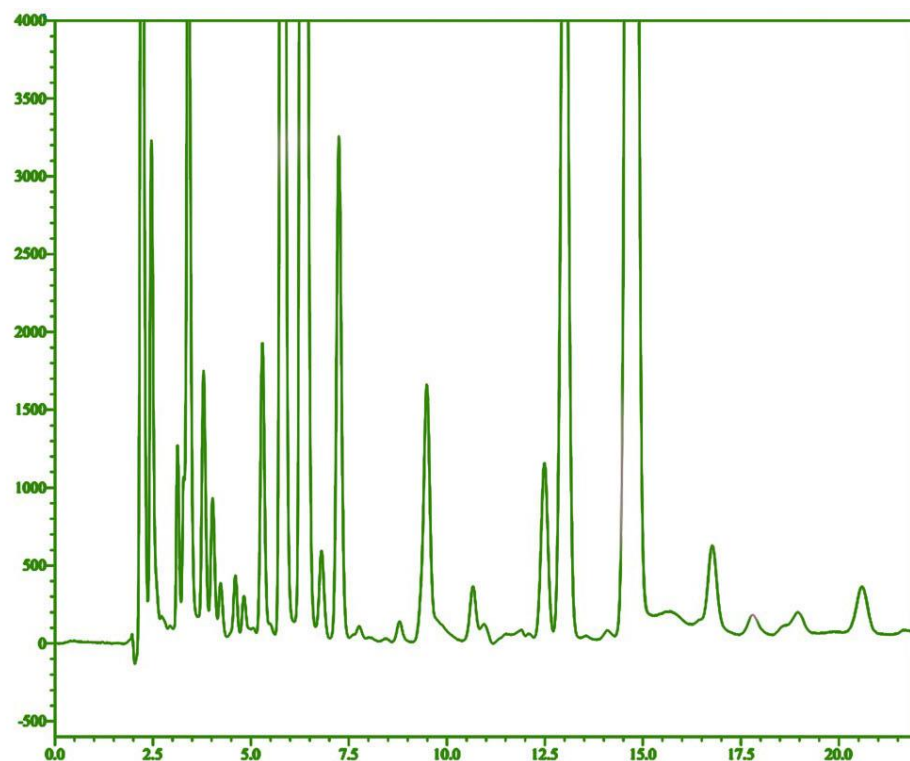

(b)

Figure S1: Identification of the hydroxyproline residue by Edman automated degradation: (a) chromatographic separation of a PTH-amino acid derivatives (standard mixture, Wako Pure Chemicals) with overlapping PTH-L-hydroxyproline analytical standard; (b) chromatographic separation of the PTH-amino acid derivatives generated on the 6th cycle of the AnmTX Sco 9a-1 analysis. A peak corresponding to the PTH-hydroxyproline is marked by lilac vertical stripe.

**Table S1.** Parameters of motor and orienting–exploratory activity of mice treated by AnmTX Sco 9a-1 in Open Field test.

| Group      | T (act), s | T (pass), s | T (c.z.), s     | T (b.z.), s      | V, m/s    | V(act), m/s | S, m     | S (act), m | N (c.z.) | N (s.p.) | N (racks)     | N (peeps)    | N (def) | T (e.c.z.), s |
|------------|------------|-------------|-----------------|------------------|-----------|-------------|----------|------------|----------|----------|---------------|--------------|---------|---------------|
| Saline     | 127.8±4.6  | 49.7±3.4    | 20.1±4.3        | 160.4±7.6        | 0.14±0.02 | 0.19±0.03   | 24.4±2.9 | 24.6±2.8   | 9.3±5.2  | 9.2±5.6  | 16.0±3.1      | 6.5±1.4      | 1.5±1.8 | 3.0±1.8       |
| 1 mg/kg    | 122.3±7.3  | 53.3±8.2    | 48.5±4.9<br>*** | 128.4±7.4<br>*** | 0.15±0.01 | 0.22±0.02   | 26.8±2.5 | 26.8±2.5   | 16.8±5.2 | 15.6±5.0 | 21.4±5.8<br>* | 9.0±3.0<br>* | 1.2±3.8 | 6.4±3.8       |
| 0.1 mg/kg  | 131.0±7.5  | 41.9±3.8    | 40.3±6.8<br>*** | 133.2±8.6<br>**  | 0.15±0.01 | 0.21±0.02   | 26.8±2.7 | 26.8±2.7   | 13.8±4.1 | 14.2±4.6 | 19.7±6.9      | 7.5±1.9      | 2.4±4.8 | 9.6±4.8       |
| 0.01 mg/kg | 125.9±3.3  | 49.9±4.9    | 31.5±5.8<br>*   | 145.2±7.2        | 0.18±0.01 | 0.25±0.02   | 28.9±3.4 | 29.7±1.8   | 19.6±4.2 | 19.6±2.9 | 19.2±1.6      | 7.25±2.1     | 1.0±2.7 | 4.8±2.7       |

Where T (act)—activity time; T (pass)—passivity time; T (c.z.)—time spent on the central zone, s; T (b.z.)—stay on the border zone, s; V, m/s—average travel speed; V(act), m/s—average movement speed during activity; S, m—distance traveled; S (act), m—distance traveled during activity; N (c.z.)—number of visits of central zone; N (s.p.)—number of visits of side platform; N (racks)—vertical activity, the number of racks; N (peeps)—holes explored, the number of peeps into minks; N (def)—number of bowel movements; T (e.c.z.)—time of exit from the central zone, s. Results are presented as mean ± SD (n = 7–8). The significance of differences was estimated by the Student's t-criterion to the saline group. Significant differences are presented as \*  $p < 0.05$ , \*\*  $p < 0.01$ , and \*\*\*  $p < 0.001$ .
